# Supplementary material
Source: Springer Nature journal article supplement (https://www.springermedizin.de/resource/supplementary/12960_2014_435_MOESM3_ESM.pdf/9570080)

# Estimated Facility-level Workload Ratio at Baseline and Endline

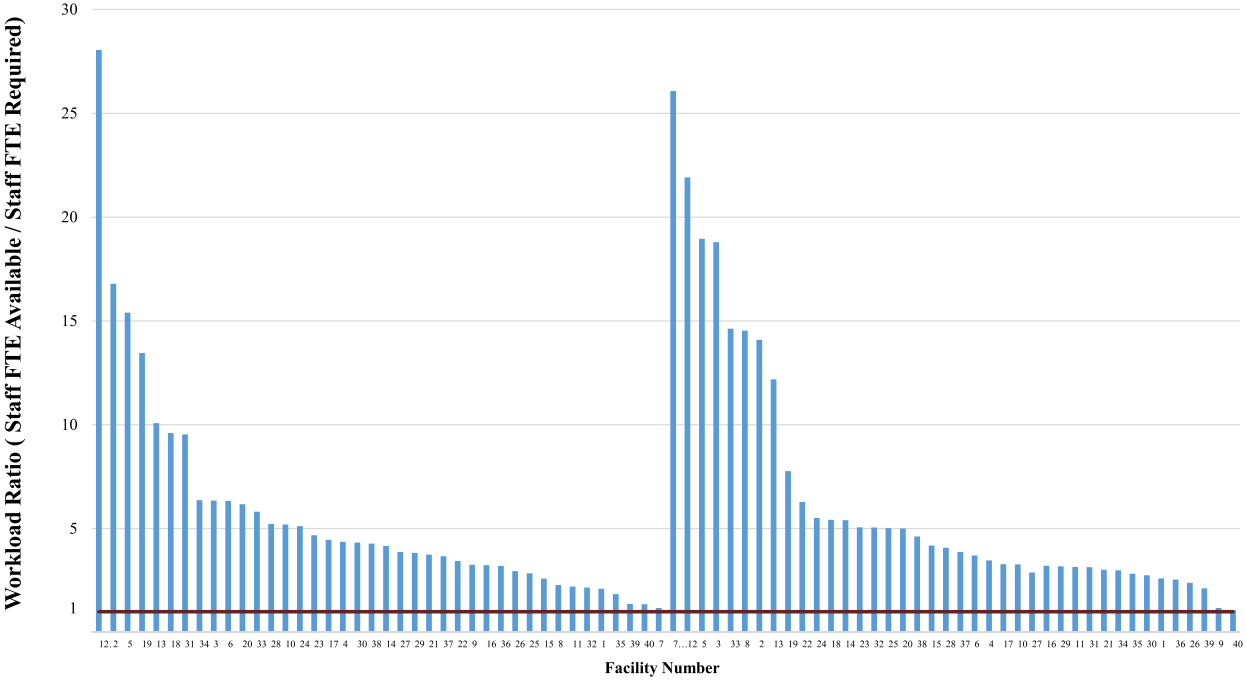

Baseline

Endline

Supplement: MOESM3 [file 9570080]
